# Supplementary material for: Collaborative Care for Depression of Adults and Adolescents: Measuring the Effectiveness of Screening and Treatment Uptake
Source: Atypon-hosted journal article supplement (doi:10.1176/appi.ps.201800257), 2019-04-26
Supplement: appi.ps.201800257.ds001.pdf [file appi.ps.201800257.ds001.pdf]

Table S1. Sample characteristics of patients eligible for the PHQ-2 and a test of proportions: eligible v. screened patients in 8 primary care clinics of a Chicago academic health center, November 2016 – December 2017 (Cohen's  $h \geq 0.20$ ).

| Characteristic   | PHQ-2 Eligible<br>(N = 25369) |       |               | PHQ-2 Screened<br>(N = 20053) |       |               | Cohen's<br>h | P-<br>value* |
|------------------|-------------------------------|-------|---------------|-------------------------------|-------|---------------|--------------|--------------|
|                  | n                             | %     | 95% CI        | n                             | %     | 95% CI        |              |              |
| Gender           |                               |       |               |                               |       |               |              | 0.21         |
| Female           | 15966                         | 62.94 | 62.34 - 63.53 | 12535                         | 62.51 | 61.83 - 63.18 | 0.01         |              |
| Male             | 9403                          | 37.06 | 36.47 - 37.66 | 7518                          | 37.49 | 36.82 - 38.17 | 0.01         |              |
| Race             |                               |       |               |                               |       |               |              | 0.53         |
| American Indian  | 111                           | 0.44  | 0.36 - 0.53   | 75                            | 0.37  | 0.30 - 0.47   | 0.01         |              |
| Asian            | 965                           | 3.80  | 3.57 - 4.05   | 780                           | 3.89  | 3.63 - 4.17   | 0.00         |              |
| Black            | 9017                          | 35.54 | 34.95 - 36.14 | 7083                          | 35.32 | 34.66 - 35.99 | 0.00         |              |
| Pacific Islander | 45                            | 0.18  | 0.13 - 0.24   | 30                            | 0.15  | 0.10 - 0.22   | 0.01         |              |
| Other*           | 3663                          | 14.44 | 14.01 - 14.88 | 2864                          | 14.28 | 13.80 - 14.78 | 0.00         |              |
| White            | 11238                         | 44.30 | 43.69 - 44.91 | 8944                          | 44.60 | 43.91 - 45.29 | 0.01         |              |
| Unknown/Refuse   | 330                           | 1.30  | 1.17 - 1.45   | 277                           | 1.38  | 1.23 - 1.56   | 0.01         |              |
| Ethnicity        |                               |       |               |                               |       |               |              | 0.07         |
| Hisp/Latinx      | 4893                          | 19.29 | 18.80 - 19.78 | 3754                          | 18.72 | 18.18 - 19.27 | 0.01         |              |
| Non-Hisp/Latinx  | 20268                         | 79.89 | 79.39 - 80.38 | 16119                         | 80.38 | 79.82 - 80.93 | 0.01         |              |
| Unspecified      | 208                           | 0.82  | 0.71 - 0.94   | 180                           | 0.90  | 0.77 - 1.04   | 0.01         |              |
| Age              |                               |       |               |                               |       |               |              | <0.01        |
| 12-17            | 2450                          | 9.66  | 9.30 - 10.03  | 1879                          | 9.37  | 8.97 - 9.78   | 0.01         |              |
| 18-25            | 2462                          | 9.70  | 9.34 - 10.08  | 2032                          | 10.13 | 9.72 - 10.56  | 0.01         |              |
| 26-35            | 4856                          | 19.14 | 18.66 - 19.63 | 4040                          | 20.15 | 19.59 - 20.71 | 0.03         |              |
| 36-45            | 3529                          | 13.91 | 13.49 - 14.34 | 2841                          | 14.17 | 13.69 - 14.66 | 0.01         |              |
| 46-55            | 3462                          | 13.65 | 13.22 - 14.08 | 2747                          | 13.70 | 13.23 - 14.18 | 0.00         |              |
| 56-65            | 3778                          | 14.89 | 14.46 - 15.34 | 2909                          | 14.51 | 14.02 - 15.00 | 0.01         |              |
| 66-75            | 2907                          | 11.46 | 11.07 - 11.86 | 2187                          | 10.91 | 10.48 - 11.35 | 0.02         |              |
| ≥76              | 1925                          | 7.59  | 7.27 - 7.92   | 1418                          | 7.07  | 6.72 - 7.44   | 0.02         |              |

\* $p < 0.05$ , chi-square

Table S2. Test of proportions: patients eligible v. screened for the PHQ-9 in 8 primary care clinics of a Chicago academic health center, November 2016 – December 2017 (Cohen's  $h \geq 0.20$ ).

| Characteristic   | PHQ-9 Eligible<br>(N = 1588) |       |               | PHQ-9 Screened<br>(N = 1042) |       |               | Cohen's<br>h | P-<br>value* |
|------------------|------------------------------|-------|---------------|------------------------------|-------|---------------|--------------|--------------|
|                  | n                            | %     | 95% CI        | n                            | %     | 95% CI        |              |              |
| Gender           |                              |       |               |                              |       |               |              | 0.62         |
| Female           | 1118                         | 70.40 | 68.08 - 72.63 | 741                          | 71.11 | 68.24 - 73.83 | 0.02         |              |
| Male             | 470                          | 29.60 | 27.37 - 31.92 | 301                          | 28.89 | 26.17 - 31.76 | 0.02         |              |
| Race             |                              |       |               |                              |       |               |              | 0.28         |
| American Indian  | 13                           | 0.82  | 0.46 - 1.44   | 6                            | 0.58  | 0.23 - 1.32   | 0.03         |              |
| Asian            | 32                           | 2.02  | 1.40 - 2.87   | 17                           | 1.63  | 0.98 - 2.66   | 0.03         |              |
| Black            | 691                          | 43.51 | 41.06 - 46.00 | 449                          | 43.09 | 40.07 - 46.17 | 0.01         |              |
| Pacific Islander | 2                            | 0.13  | 0.02 - 0.51   | 1                            | 0.10  | 0.01 - 0.62   | 0.01         |              |
| Other*           | 264                          | 16.62 | 14.84 - 18.57 | 202                          | 19.39 | 17.05 - 21.95 | 0.07         |              |
| White            | 577                          | 36.34 | 33.97 - 38.76 | 360                          | 34.55 | 31.68 - 37.54 | 0.04         |              |
| Unknown/Refuse   | 9                            | 0.57  | 0.28 - 1.11   | 7                            | 0.67  | 0.29 - 1.44   | 0.01         |              |
| Ethnicity        |                              |       |               |                              |       |               |              | 0.58         |
| Hisp/Latinx      | 387                          | 24.37 | 22.29 - 26.57 | 267                          | 25.62 | 23.02 - 28.41 | 0.03         |              |
| Non-Hisp/Latinx  | 1195                         | 75.25 | 73.04 - 77.34 | 772                          | 74.09 | 71.29 - 76.70 | 0.03         |              |
| Unspecified      | 6                            | 0.38  | 0.15 - 0.86   | 3                            | 0.29  | 0.07 - 0.91   | 0.02         |              |
| Age              |                              |       |               |                              |       |               |              | <0.01        |
| 12-17            | 196                          | 12.34 | 10.79 - 14.09 | 203                          | 19.48 | 17.15 - 22.05 | 0.20         |              |
| 18-25            | 174                          | 10.96 | 9.48 - 12.62  | 149                          | 14.30 | 12.26 - 16.61 | 0.10         |              |
| 26-35            | 270                          | 17.00 | 15.20 - 18.96 | 188                          | 18.04 | 15.87 - 20.54 | 0.03         |              |
| 36-45            | 218                          | 13.73 | 12.09 - 15.54 | 133                          | 12.76 | 10.83 - 14.98 | 0.03         |              |
| 46-55            | 251                          | 15.81 | 14.06 - 17.71 | 128                          | 12.28 | 10.38 - 14.47 | 0.10         |              |
| 56-65            | 221                          | 13.92 | 12.27 - 15.74 | 111                          | 10.65 | 8.88 - 12.72  | 0.10         |              |
| 66-75            | 152                          | 9.57  | 8.19 - 11.15  | 84                           | 8.06  | 6.51 - 9.92   | 0.05         |              |
| ≥76              | 106                          | 6.68  | 5.52 - 8.04   | 46                           | 4.41  | 3.28 - 5.89   | 0.10         |              |

\* $p < 0.05$ , chi-square

Table S3. Patients referred to Collaborative Care by risk category and per treatment pathway, November 2016 – December 2017, at 10 Chicago primary care clinics.

| PHQ-9<br>Score<br>Risk<br>Category | Treatment Pathway(s), n and as % |      |                             |      |                              |      |      |      |                |      | Treated vs. Referred                     |       |                                            |       |
|------------------------------------|----------------------------------|------|-----------------------------|------|------------------------------|------|------|------|----------------|------|------------------------------------------|-------|--------------------------------------------|-------|
|                                    | Community<br>Mental<br>Health*   |      | Psychotropic<br>Medication* |      | Anti-<br>Depressant<br>Meds* |      | CBT* |      | CBT &<br>Meds* |      | Total<br>Treated Per<br>Risk<br>Category |       | Total<br>Referrals Per<br>Risk<br>Category |       |
|                                    | n                                | %    | n                           | %    | n                            | %    | n    | %    | n              | %    | n                                        | %     | N                                          | %     |
| No<br>PHQ-9                        | 14                               | 11.2 | 22                          | 7.6  | 18                           | 7.2  | 3    | 9.1  | 1              | 6.7  | 34                                       | 9.19  | 73                                         | 11.44 |
| < 10                               | 5                                | 4.0  | 7                           | 2.4  | 7                            | 2.8  | 2    | 6.1  | 1              | 6.7  | 13                                       | 3.51  | 34                                         | 5.33  |
| 10-14                              | 47                               | 37.6 | 93                          | 32.2 | 81                           | 32.4 | 15   | 45.5 | 7              | 46.7 | 127                                      | 34.32 | 249                                        | 39.03 |
| 15-19                              | 40                               | 32.0 | 105                         | 36.3 | 89                           | 35.6 | 8    | 24.2 | 4              | 26.7 | 126                                      | 34.05 | 189                                        | 29.62 |
| 20-27                              | 19                               | 15.2 | 62                          | 21.5 | 55                           | 22.0 | 5    | 15.2 | 2              | 13.3 | 70                                       | 18.92 | 93                                         | 14.58 |
| TOTAL                              | 125                              |      | 289                         |      | 250                          |      | 33   |      | 15             |      | 370                                      |       | 638                                        |       |

\*Pathways are not mutually exclusive; psychotropic medication includes anti-depressant medication.
